# Supplementary material for: BAP1 suppresses prostate cancer progression by deubiquitinating and stabilizing PTEN
Source: PubMed Central journal article supplement (PMC7782096; doi:10.1002/1878-0261.12844), 2020-11-20
Supplement: MOL2-15-279-s001.pdf [file MOL2-15-279-s001.pdf]

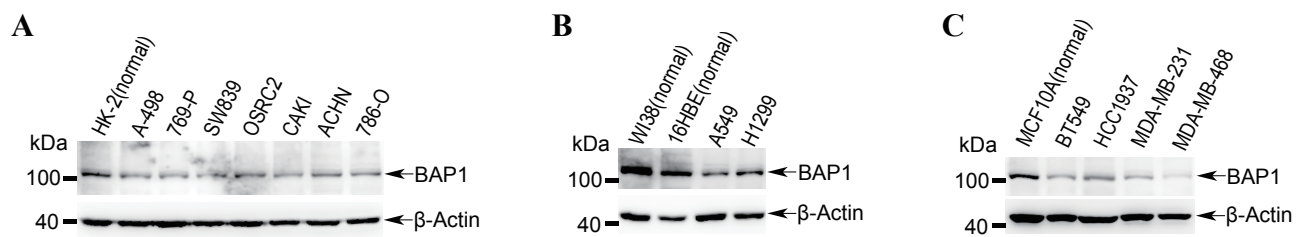

Fig. S1. The protein level of BAP1 in renal carcinoma cell lines (A), lung cancer cell lines (B) and breast cancer cell lines (C). Whole cell lysates were used for Western blotting with antibodies against BAP1 and  $\beta$ -actin.
