# Supplementary material for: BAP1 suppresses prostate cancer progression by deubiquitinating and stabilizing PTEN
Source: PubMed Central journal article supplement (PMC7782096; doi:10.1002/1878-0261.12844), 2020-11-20
Supplement: MOL2-15-279-s005.pdf [file MOL2-15-279-s005.pdf]

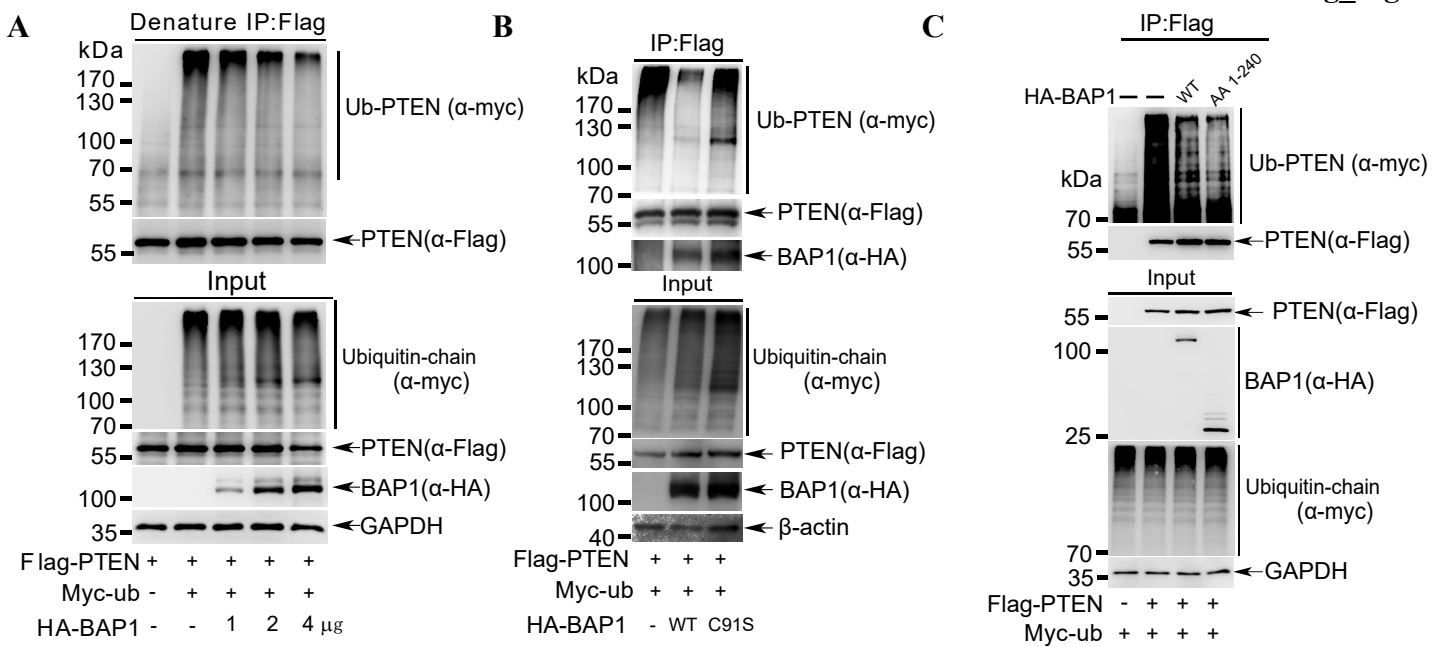

Fig. S5. BAP1 deubiquitinates PTEN. (A) 293T cells were transfected with Flag-PTEN, Myc-Ubiquitin and an increasing amount of HA-BAP1. Lysates were used for immunoprecipitation with anti-Flag antibody under denaturing condition, and followed by Western blotting analysis with anti-Myc antibody. (B) Lysates from 293T cells transfected with Flag-PTEN, Myc-Ubiquitin and BAP1<sup>WT</sup> or BAP1<sup>C91S</sup> were immunoprecipitated with anti-Flag antibody, and followed by Western blotting analysis with anti-Myc antibody. (C) Lysates from 293T cells transfected with Flag-PTEN, Myc-Ubiquitin and full-length HA-BAP1<sup>WT</sup> or truncated HA-BAP1<sup>1-240</sup> were immunoprecipitated with anti-Flag antibody, and followed by Western blotting analysis with anti-Myc antibody.
