# Supplementary material for: BAP1 suppresses prostate cancer progression by deubiquitinating and stabilizing PTEN
Source: PubMed Central journal article supplement (PMC7782096; doi:10.1002/1878-0261.12844), 2020-11-20
Supplement: MOL2-15-279-s006.pdf [file MOL2-15-279-s006.pdf]

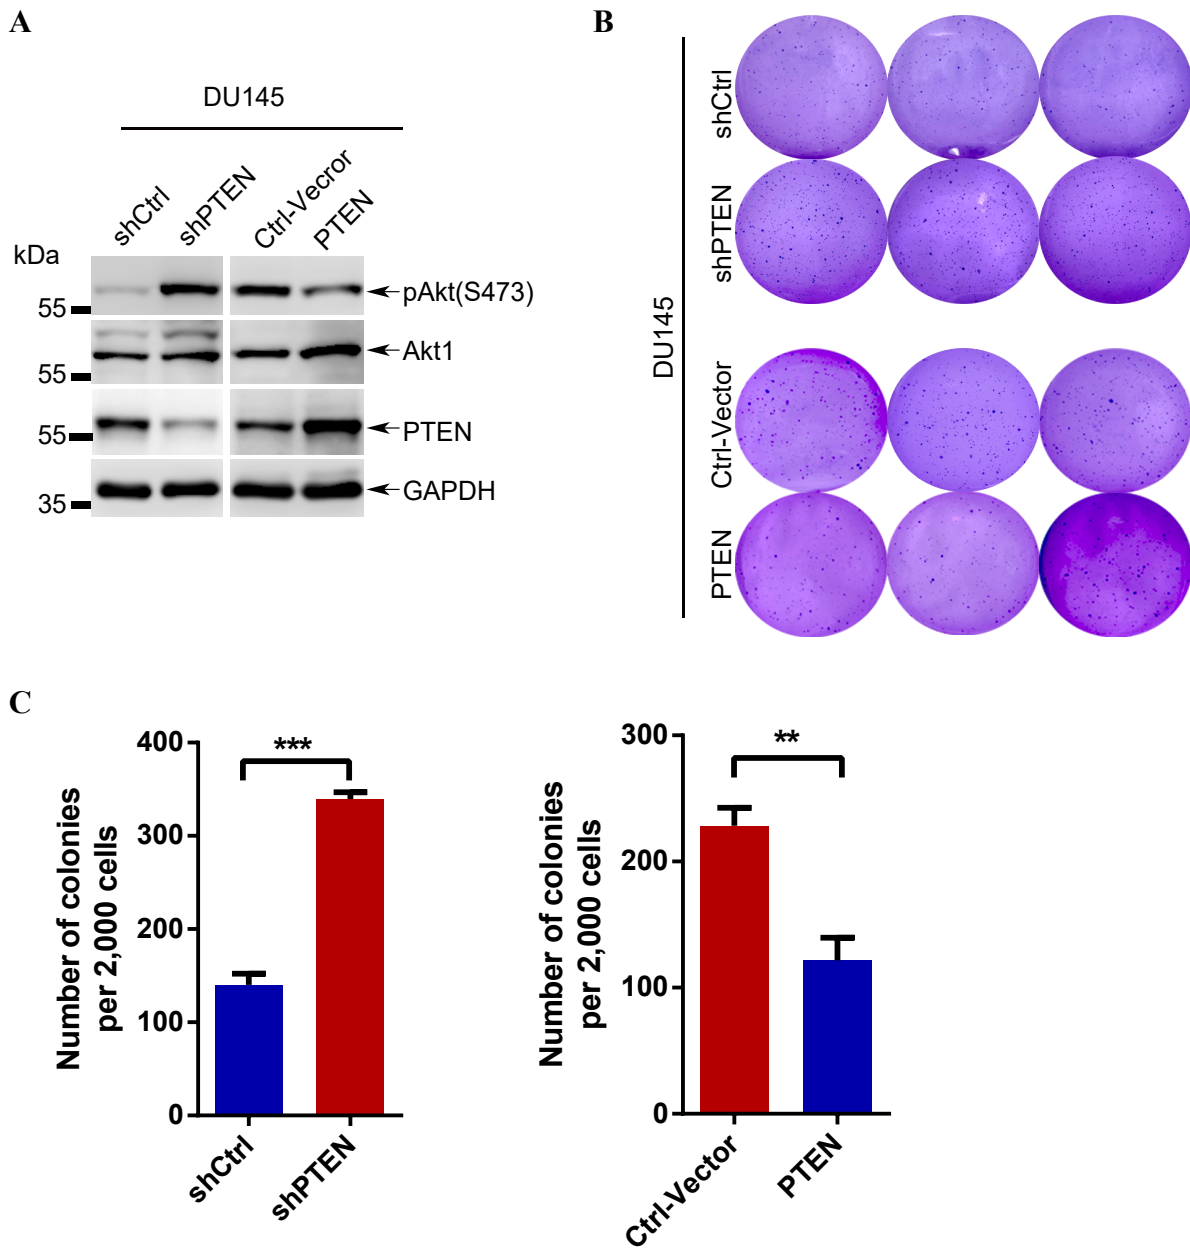

Fig. S6. Downregulated PTEN expression promotes activation of Akt pathway and PCa progression. (A) Western blotting analysis for p-Akt (Ser473) in DU145 stable cells with PTEN knockdown or overexpression. (B-C) Soft agar colony formation assays for DU145 stable cell lines. The representative photographs of colonies were taken (B), and the number of colonies was scored (C). Error bars indicated mean  $\pm$  SD. Data analysis was conducted by unpaired t-test (\* $P < 0.05$ , \*\* $P < 0.01$ , \*\*\* $P < 0.001$ ).
