# Supplementary material for: BAP1 suppresses prostate cancer progression by deubiquitinating and stabilizing PTEN
Source: PubMed Central journal article supplement (PMC7782096; doi:10.1002/1878-0261.12844), 2020-11-20
Supplement: MOL2-15-279-s007.pdf [file MOL2-15-279-s007.pdf]

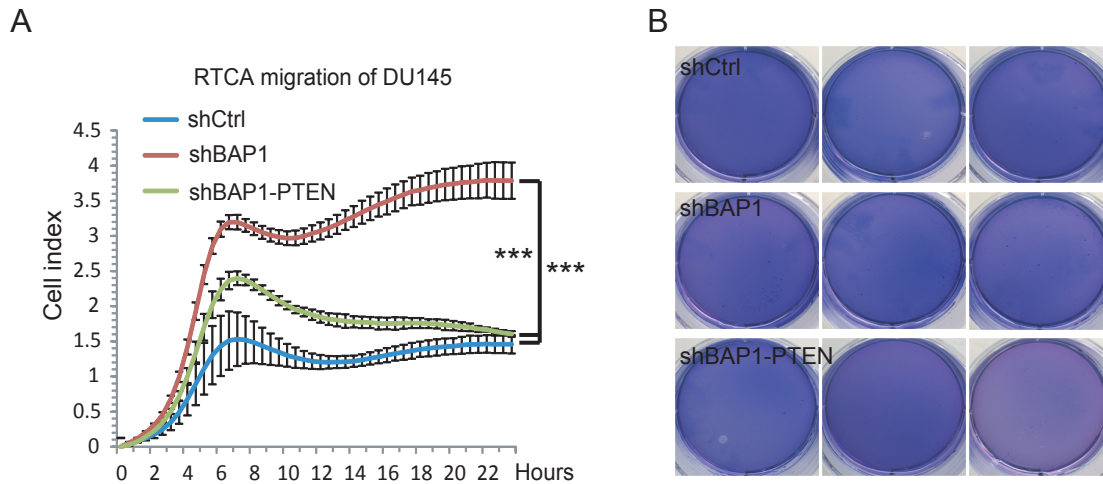

Fig. S7. BAP1 inhibits tumorigenesis through maintenance of PTEN. (A) Stable DU145 cell lines were serum starved for 4-6 hours, then detached with trypsin and resuspended in serum-free medium with concentration of  $1 \times 10^5$  cells per ml. 100  $\mu$ l of suspension was seeded into the pre-equilibrated upper chamber of the CIM-plate along with the bottom well containing complete medium for migration. Cell index values were detected every 15 min. Error bars indicate  $\pm$ SD. These are related to Fig.6C. (B) Stable DU145 cell lines were seeded in 2 ml of medium containing 5% FBS with 0.35% agar at 2000 cells/well. The number of colonies was scored. These are related to Fig. 6E. The DU145 stable cells with BAP1 knockdown were established by using BAP1-shRNA-1#.
